# Supplementary material for: Petunia nectar proteins have ribonuclease activity
Source: PubMed Central journal article supplement — J Exp Bot. 2010 May 11;61(11):2951–65. doi: 10.1093/jxb/erq119 (PMC2892141; doi:10.1093/jxb/erq119), 2010-05-11
Supplement: erq119_1.pdf [file erq119_1.pdf]

## Petunia nectar proteins have ribonuclease activity

Melissa S. Hillwig, Xiaoteng Liu, Guangyu Liu, Robert W. Thornburg,  
and Gustavo C. MacIntosh

### Supplemental Table 1. Primers used in this work

| Cloning / RT-PCR           | 5' -> 3'                   |
|----------------------------|----------------------------|
| <i>RNase Phy1</i> -Forward | GGCGTCAATATTTGCCACTTCTATG  |
| <i>RNase Phy1</i> -Reverse | CGATTCCAGGAGTAAATCCAGTTG   |
| <i>RNase Phy3</i> -Forward | CTGAATTGCTCGGAACCAAAATTAAC |
| <i>RNase Phy3</i> -Reverse | TGACAATATTTTTGGGGGACGGC    |
| <i>RNase Phy4</i> -Forward | GTAGTAAGCCGGACACAAAGTCATGC |
| <i>RNase Phy4</i> -Reverse | CCTGTTAGTTGTACCTGTCCCGTTC  |
| <i>RNase Phy5</i> -Forward | ATTGTGATACAAGGCGTAGTTGCTG  |
| <i>RNase Phy5</i> -Reverse | GAGAAAGGAGGGAATTCAATCTTAG  |
| 18s - Forward              | ACTAATTCAGACTGTGAAACTGCCA  |
| 18s - Reverse              | CTTGCTTTGAGCACTCTAATTTCT   |

| RACE                       | 5' -> 3'                       |
|----------------------------|--------------------------------|
| <i>RNase Phy3</i> -Forward | TGGTACGGATGAGGGTCTGGATACATG    |
| <i>RNase Phy3</i> -Reverse | GGACGGCCACAACCTCTATTAGCATGAG   |
| <i>RNase Phy4</i> -Forward | GGCCAGCAAATGCATACGCGAACAGTTTG  |
| <i>RNase Phy4</i> -Reverse | CCAAGGGGTTGAGAGCTCTCCCAAGTTGAC |
