# Supplementary material for: Petunia nectar proteins have ribonuclease activity
Source: PubMed Central journal article supplement — J Exp Bot. 2010 May 11;61(11):2951–65. doi: 10.1093/jxb/erq119 (PMC2892141; doi:10.1093/jxb/erq119), 2010-05-11
Supplement: erq119_2.pdf [file erq119_2.pdf]

## Petunia nectar proteins have ribonuclease activity

Melissa S. Hillwig, Xiaoteng Liu, Guangyu Liu, Robert W. Thornburg, and Gustavo C. MacIntosh

### Supplemental Figure 1.

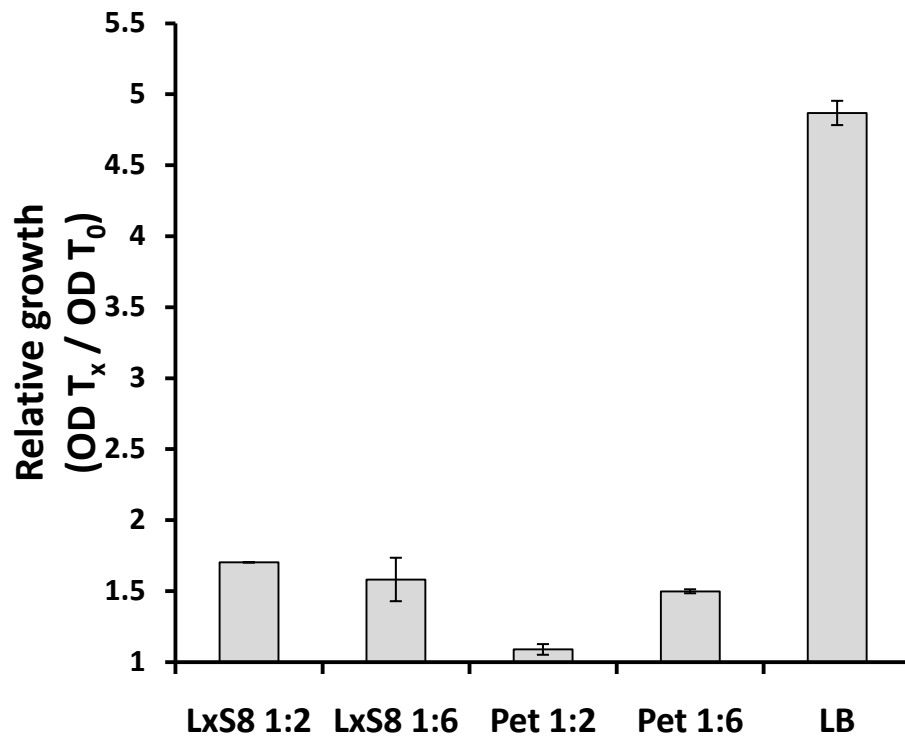

Effect of tobacco and petunia nectar on bacterial growth. Growth of *Pseudomonas fluorescens* (strain A506) in 1:2 or 1:6 dilutions of nectar from *Petunia hybrida* (Pet) and the ornamental tobacco hybrid LxS8 (*Nicotiana langsdorffii* x *Nicotiana sanderae* var LxS8) was determined after an overnight culture by changes in OD. Bacterial growth on LB medium is shown for comparison.
