# Supplementary material for: Petunia nectar proteins have ribonuclease activity
Source: PubMed Central journal article supplement — J Exp Bot. 2010 May 11;61(11):2951–65. doi: 10.1093/jxb/erq119 (PMC2892141; doi:10.1093/jxb/erq119), 2010-05-11
Supplement: erq119_3.pdf [file erq119_3.pdf]

## Petunia nectar proteins have ribonuclease activity

Melissa S. Hillwig, Xiaoteng Liu, Guangyu Liu, Robert W. Thornburg, and Gustavo C. MacIntosh

### Supplemental Figure 2.

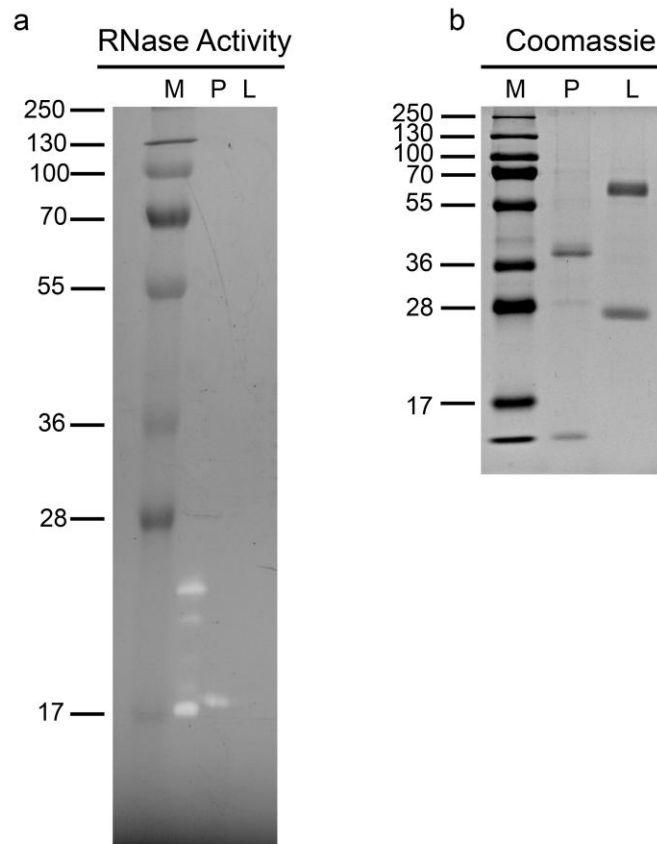

Ribonuclease activities are present in nectar. **a.** Aliquots (5  $\mu$ g) of raw nectar from *Petunia hybrida* and ornamental tobacco (*Nicotiana langsdorffii* x *Nicotiana sanderae* var LxS8) were analyzed in an *in gel* RNase activity assay. P, petunia; L, LxS8. Size (kDa) of molecular weight markers (M) is indicated. **b.** Same samples as in **a**, analyzed by SDS-PAGE, and stained with Coomassie Blue. Gels are representative of at least 3 independent experiments.
